# Supplementary material for: Top-down strategy synthesis of fluorinated graphdiyne for lithium ion battery
Source: Royal Society of Chemistry journal article supplement (doi:10.1039/c9ra05974a), 2019-01-01
Supplement: c9ra05974a1.pdf [file c9ra05974a1.pdf]

## Support Information

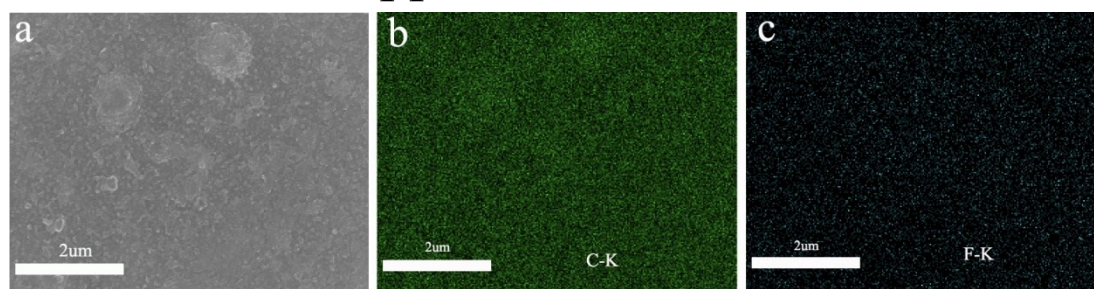

Fig. S1. SEM and EDS elemental mapping images of the F doped GDY film.

Table S1. Elemental content of F doped GDY from EDX.

| Element | Weight ratio (%) | Atom ratio (%) |
|---------|------------------|----------------|
| C K     | 82.26            | 88.00          |
| F K     | 17.74            | 12.00          |
| total   | 100.00           | 100.00         |

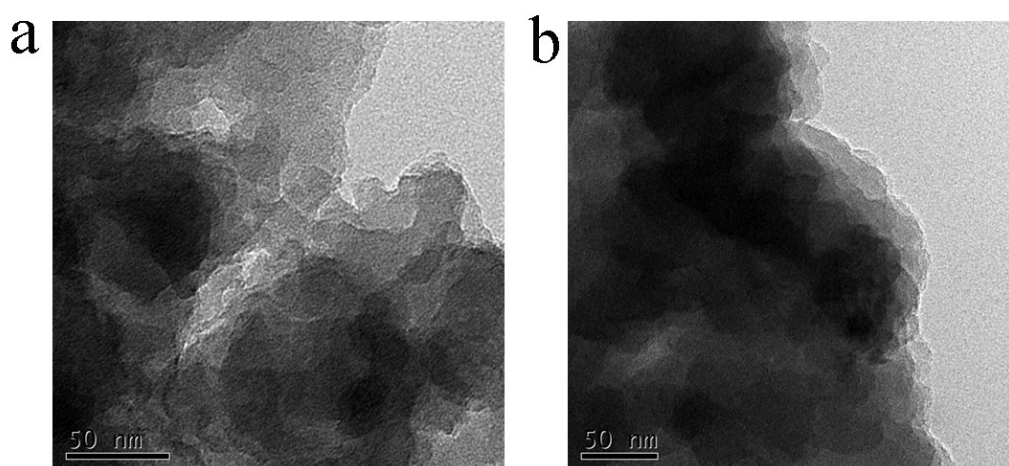

Fig. S2. TEM image, a is GDY, and b is F doped GDY.

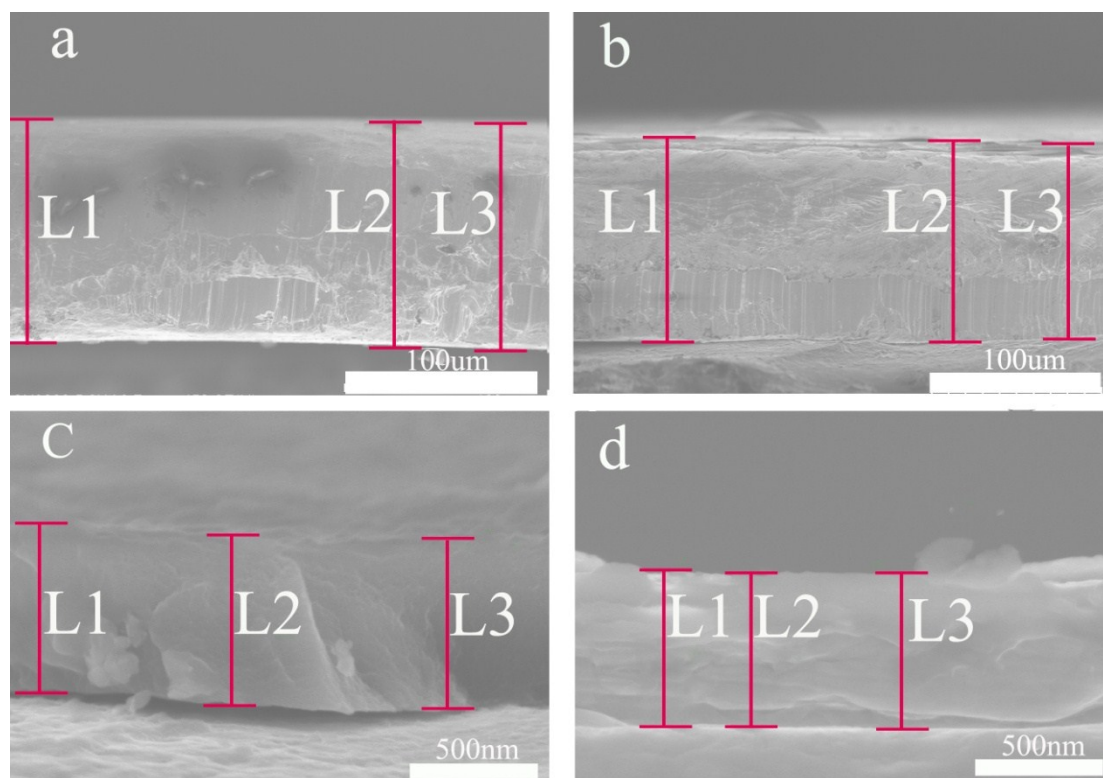

Fig. S3. (a) cross-sectional SEM images of (a) Cu, (b) Cu when GDY is synthesized, (c) GDY and (d) F doped GDY.

Table S2 shows the thickness of the GDY and F doped GDY films are 678 nm and 610 nm, respectively. The copper consumption of the synthetic GDY process was 78 nm calculate from SEM cross-section. The density of GDY and F doped GDY are 1323.9 and 2386.6 mg/cm<sup>3</sup>, respectively. The electrodes of GDY and F doped GDY have a diameter of 1.2 cm. The weight of GDY and F doped GDY were calculated by  $m = \rho V$ , list in the Table S2.

Table S2. The thickness and weight of the sample.

|             | L1     | L2     | L3     | Average  | Single electrodes weight |
|-------------|--------|--------|--------|----------|--------------------------|
| Cu          | 115 um | 117 um | 116 um | 116 .0um | -                        |
| Cu+GDY      | 118 um | 117 um | 115 um | 116.6 um | -                        |
| GDY         | 680 nm | 674 nm | 680 nm | 678.0 nm | 0.10 mg                  |
| F doped GDY | 615 nm | 605 nm | 610nm  | 610.0nm  | 0.16 mg                  |

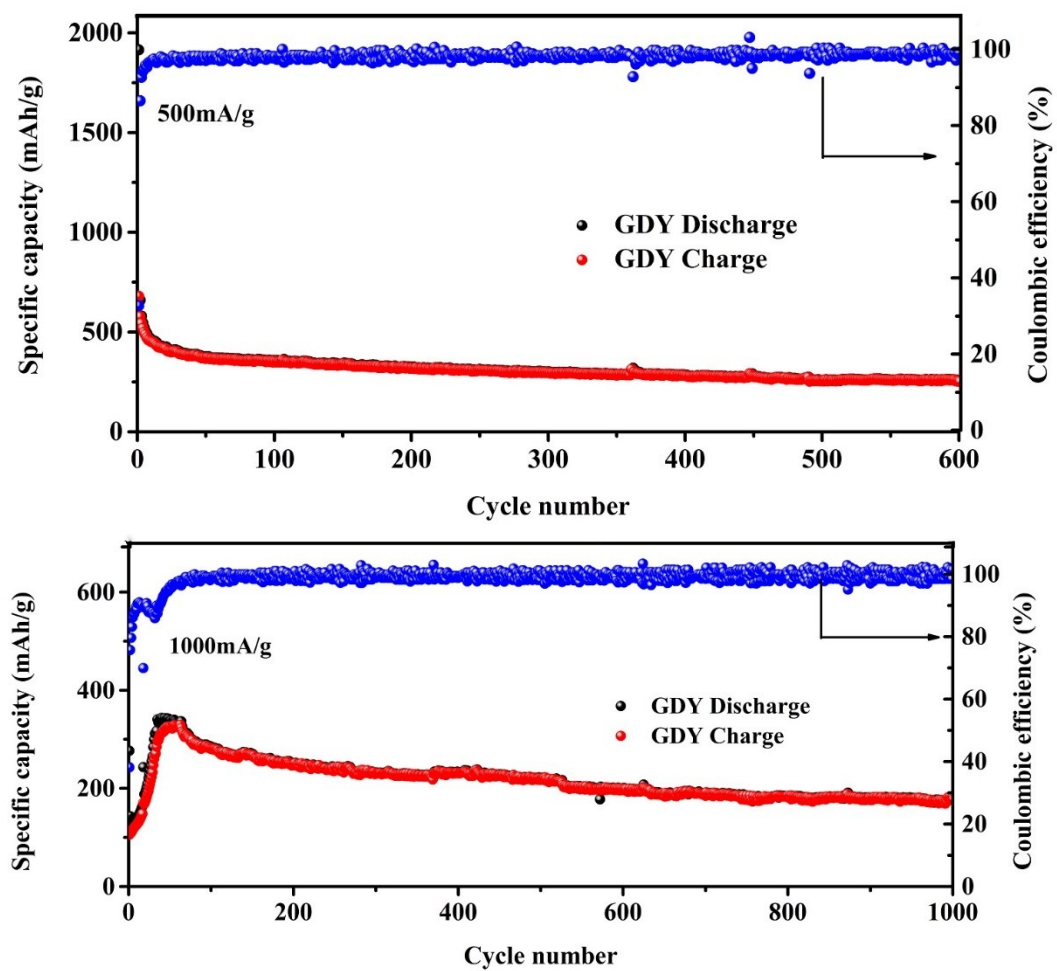

Fig. S4. The coulombic efficiency of GDY at a current density of 500 mA/g and 1000 mA/g.

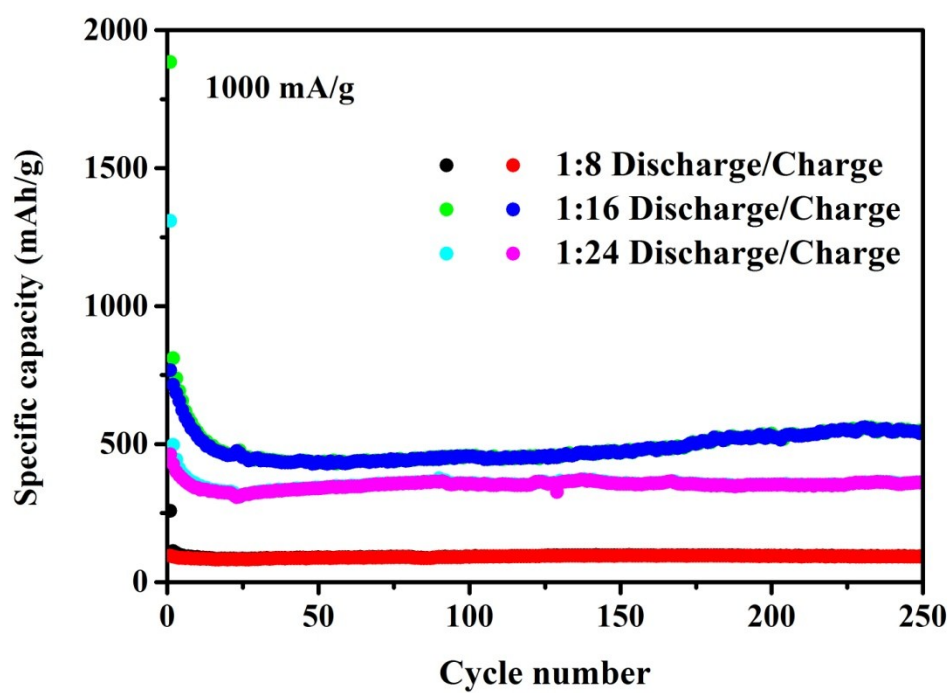

Fig. S5.Cycling performance of F-GDY under different concentrations of fluorine doped .
